# Supplementary material for: A novel electrochemical biosensor for DNA detection based on exonuclease III-assisted target recycling and rolling circle amplification
Source: Royal Society of Chemistry journal article supplement (doi:10.1039/c4ra11433g), 2014-12-22
Supplement: c4ra11433g1.pdf [file c4ra11433g1.pdf]

## A novel electrochemical biosensor for DNA detection based on exonuclease III assisted target recycling and rolling circle amplification

Fenglei Gao\*, Yan Du, Jingwen Yao, Yanzhuo Zhang, Jian Gao

Jiangsu Key Laboratory of New Drug Research and Clinical Pharmacy, School of Pharmacy, Xuzhou Medical College, 221004, Xuzhou, China.

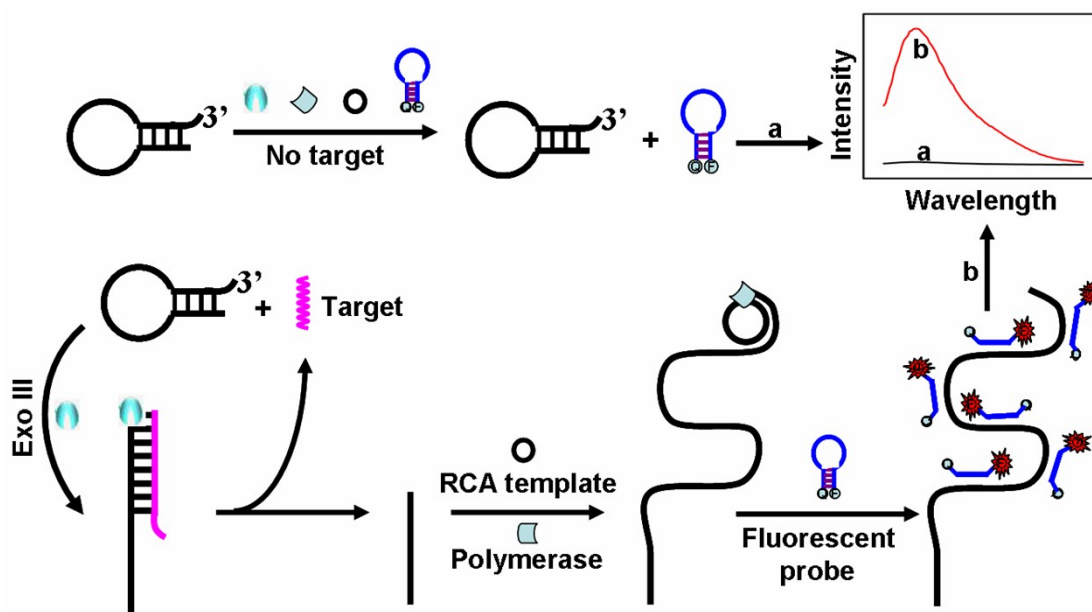

**Scheme S1** Schematic representation of fluorescent detection of DNA based on Exo III assisted DNA recycling and RCA for dual signal amplification.

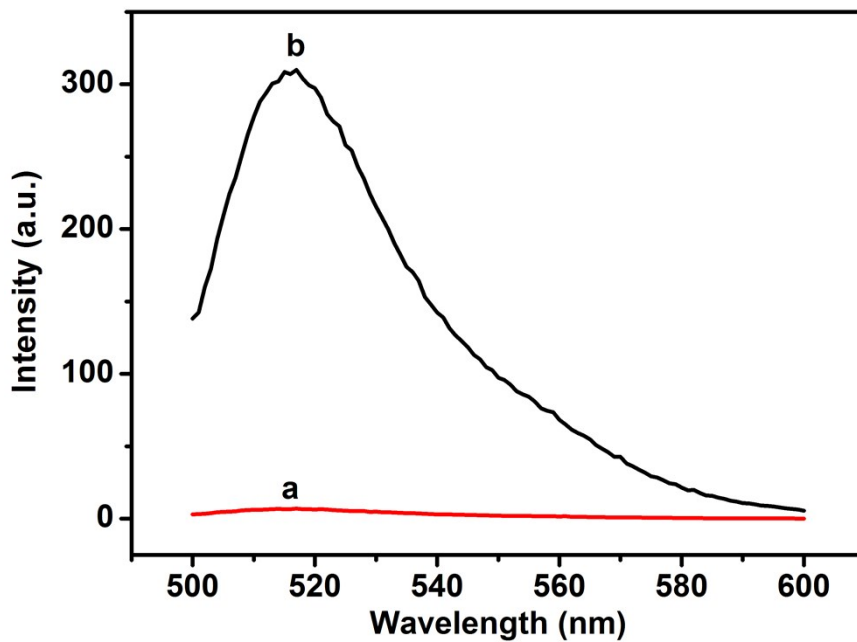

**Fig. S1** Fluorescence spectra of (a) no target, MB, Exo III, RCA template, dNTPs and polymerase and fluorescence probe. (b) target, MB, Exo III, RCA template, dNTPs and polymerase and fluorescence probe.

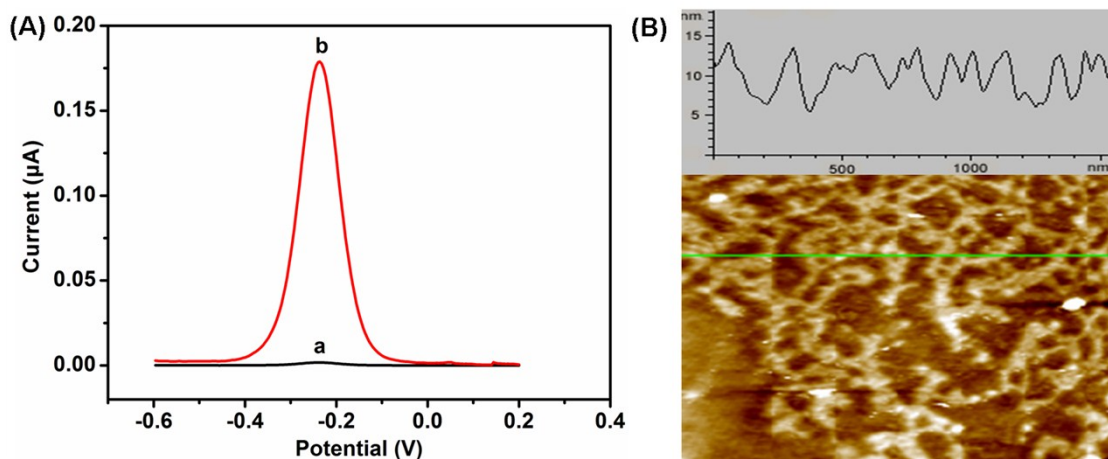

**Fig. S2** (A) Differential pulse voltammetry (DPV) responses of the gold electrode (a) and GE modified with MB (b) after adsorption of RuHex. (B) AFM height image of MB modified glass slides.
